# Supplementary material for: Evidence for a multi-species coccolith volume change over the past two centuries: understanding a potential ocean acidification response
Source: Copernicus journal article supplement (doi:10.5194/bg-5-1651-2008), 2008-12-10
Supplement: Supplementary file 1 [file bg-5-1651-2008-supplement.zip]

## Supplementary Materials

| Species              | Volumes<br>( $\mu\text{m}^3$ ) | From Young and Ziveri<br>(2000) |  | Equivalent<br>Diameters ( $\mu\text{m}$ ) | Spherical |
|----------------------|--------------------------------|---------------------------------|--|-------------------------------------------|-----------|
|                      | Min.                           | Max.                            |  | Min.                                      | Max.      |
| <i>C. pelagicus</i>  | 13                             | 246                             |  | 2.92                                      | 7.77      |
| <i>C. leptoporus</i> | 10                             | 106                             |  | 2.67                                      | 5.87      |
| <i>O. fragilis</i>   | 9                              | 36                              |  | 2.58                                      | 4.10      |
| <i>H. carteri</i>    | 27                             | 86                              |  | 3.72                                      | 5.48      |
| <i>G. muelleriae</i> | 1.4                            | 4.6                             |  | 1.39                                      | 2.06      |
| <i>G. oceanica</i>   | 2.14                           | 6.2                             |  | 1.60                                      | 2.28      |
| <i>E. huxleyi</i>    | 0.31                           | 1.8                             |  | 0.84                                      | 1.51      |

Table 1. Conversion of typical coccolith volumes to equivalent spherical diameters, using the formula for a sphere.

$\text{CaCO}_3$  particle volume frequency distribution in 256 size bins distributed on a log basis across the 9.37  $\mu\text{m}$  equivalent spherical diameter sizing window (0.63 to 10  $\mu\text{m}$ ), from 1770 to 2004. Individual bin values normalised by dividing by the total number of counts in that sample.
